# Supplementary material for: Unique Polymorphisms at BCL11A, HBS1L-MYB and HBB Loci Associated with HbF in Kuwaiti Patients with Sickle Cell Disease
Source: MDPI journal article supplement (doi:10.3390/jpm11060567), 2021-06-17
Supplement: s1 [file s1]

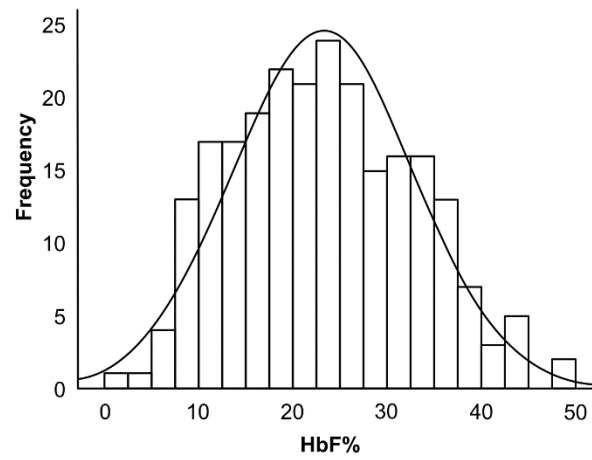

**Figure S1.** Distribution of HbF levels among patients.



**Table S2.** Fetal hemoglobin association results for 36 SNPs at the HBS1L-MYB locus in Kuwaiti patients with SCD

| Locus            | SNP ID     | Location  | MAF     | A1 | HbF-1    |          | HbF-2    |          | HbF-3    |          | $\beta$ | <i>P</i> |
|------------------|------------|-----------|---------|----|----------|----------|----------|----------|----------|----------|---------|----------|
|                  |            |           |         |    | $\chi^2$ | <i>P</i> | $\chi^2$ | <i>P</i> | $\chi^2$ | <i>P</i> |         |          |
| <i>HBS1L-MYB</i> | rs9494145  | 135111414 | 0.1287  | C  | 4.23     | 0.0781   | 6.33     | 0.0119   | 8.487    | 0.0037   | 0.71    | 0.0087   |
|                  | rs9483788  | 135114363 | 0.1435  | C  | 3.96     | 0.0596   | 5.14     | 0.02343  | 7.964    | 0.0048   | 0.63    | 0.0140   |
|                  | rs6920211  | 135110180 | 0.211   | C  | 2.33     | 0.2249   | 3.96     | 0.04667  | 7.7      | 0.0047   | 0.66    | 0.0058   |
|                  | rs4895441  | 135105435 | 0.116   | G  | 3.16     | 0.2300   | 4.7      | 0.0300   | 6.72     | 0.0090   | 0.68    | 0.0173   |
|                  | rs9389269  | 135106021 | 0.116   | C  | 3.16     | 0.2300   | 4.70     | 0.0300   | 5.90     | 0.0370   | 0.64    | 0.0290   |
|                  | rs9402686  | 135106679 | 0.116   | A  | 3.16     | 0.2300   | 4.70     | 0.0300   | 6.719    | 0.0090   | 0.68    | 0.0173   |
|                  | rs4895440  | 135105420 | 0.1941  | T  | 1.38     | 0.3383   | 2.41     | 0.1203   | 8.00     | 0.0050   | 0.6775  | 0.00706  |
|                  | rs9402685  | 135098550 | 0.1646  | C  | 2.41     | 0.1217   | 2.62     | 0.1056   | 5.94     | 0.0148   | 0.55    | 0.0248   |
|                  | rs6930223  | 135103065 | 0.4916  | G  | 0.78     | 0.5973   | 0.00     | 0.9814   | 5.72     | 0.0174   | -0.44   | 0.0232   |
|                  | rs9376092  | 135106006 | 0.1224  | A  | 2.33     | 0.1320   | 2.80     | 0.0900   | 6.40     | 0.0100   | 0.64    | 0.0204   |
|                  | rs9494142  | 135110502 | 0.1414  | C  | 3.13     | 0.0800   | 3.58     | 0.05     | 6.32     | 0.0100   | 0.61    | 0.0195   |
|                  | rs34778774 | 135097900 | 0.163   | 2* | 1.949    | 0.16695  | 2.4485   | 0.1185   | 6.2195   | 0.01267  | 0.59    | 0.02092  |
|                  | rs11759553 | 135101158 | 0.2004  | T  | 0.6323   | 0.4331   | 0.8      | 0.3716   | 7.236    | 0.0072   | 0.65    | 0.0078   |
|                  | rs9376090  | 135090090 | 0.1097  | C  | 4.20     | 0.0529   | 5.47     | 0.0194   | 7.08     | 0.0090   | 0.70    | 0.0168   |
|                  | rs28384513 | 135055071 | 0.2068  | G  | 1.5972   | 0.2728   | 2.59     | 0.1074   | 0.59     | 0.5138   | 0.17    | 0.5089   |
|                  | rs9389266  | 135090599 | 0.1646  | T  | 3.36     | 0.0693   | 3.80     | 0.0513   | 0.17     | 0.74     | -0.09   | 0.7348   |
|                  | rs41294856 | 135091244 | 0.1435  | T  | 0.11     | 0.7478   | 0.14     | 0.7043   | 0.13     | 0.7832   | 0.07    | 0.7872   |
|                  | rs41294858 | 135091498 | 0.1414  | C  | 0.09     | 0.7580   | 0.10     | 0.7557   | 0.07     | 0.8015   | 0.02    | 0.8057   |
|                  | rs41294860 | 135092931 | 0.1435  | G  | 0.11     | 0.7478   | 0.14     | 0.7043   | 0.13     | 0.7832   | 0.07    | 0.7871   |
|                  | rs56076748 | 135093071 | 0.1435  | A  | 0.11     | 0.7478   | 0.14     | 0.7043   | 0.13     | 0.7832   | 0.07    | 0.7872   |
|                  | rs9494139  | 135093655 | 0.1414  | G  | 2.36     | 0.1409   | 1.62     | 0.2037   | 0.27     | 0.6717   | -0.13   | 0.6683   |
|                  | rs55731938 | 135093712 | 0.1477  | A  | 0.36     | 0.6314   | 0.68     | 0.4096   | 0.88     | 0.3575   | 0.24    | 0.3653   |
|                  | rs7775698  | 135097497 | 0.03165 | T  | 0.56     | 0.5725   | 1.07     | 0.3001   | 0.36     | 0.5515   | -0.37   | 0.5468   |
|                  | rs7776196  | 135097850 | 0.03165 | G  | 0.10     | 0.7646   | 0.17     | 0.6844   | 0.16     | 0.7477   | -0.21   | 0.7447   |
|                  | rs9402684  | 135098167 | 0.4831  | T  | 0.6817   | 0.5225   | 0.07     | 0.7894   | 3.00     | 0.0843   | -0.32   | 0.0980   |
|                  | rs7743042  | 135098696 | 0.4789  | A  | 0.6623   | 0.4880   | 0.15     | 0.6971   | 3.23     | 0.0725   | -0.34   | 0.0828   |
|                  | rs1074849  | 135102274 | 0.2342  | A  | 0.814    | 0.4874   | 0.09     | 0.7593   | 0.27     | 0.7235   | 0.08    | 0.7317   |



**Table S3.** Fetal hemoglobin association results for 52 SNPs at the HBB locus in Kuwaiti patients with SCD

| Locus      | SNP ID       | Location | MAF      | A1 | HbF-1    |                        | HbF-2    |                        | HbF-3    |          | $\beta$ | <i>P</i> |
|------------|--------------|----------|----------|----|----------|------------------------|----------|------------------------|----------|----------|---------|----------|
|            |              |          |          |    | $\chi^2$ | <i>P</i>               | $\chi^2$ | <i>P</i>               | $\chi^2$ | <i>P</i> |         |          |
| <i>HBB</i> | rs2855039    | 5250441  | 0.2131   | C  | 18.13    | 2.60 x10 <sup>-5</sup> | 18.22    | 2.44 x10 <sup>-5</sup> | 3.39     | 0.1984   | -1.08   | 0.0002   |
|            | rs2071348    | 5242916  | 0.2152   | T  | 17.61    | 3.34 x10 <sup>-5</sup> | 17.47    | 3.76 x10 <sup>-5</sup> | 3.11     | 0.1849   | -1.07   | 0.0003   |
|            | rs2855121    | 5256061  | 0.2215   | C  | 16.10    | 6.65 x10 <sup>-5</sup> | 15.32    | 0.000128               | 3.12     | 0.2010   | -0.99   | 0.0005   |
|            | rs2855122    | 5256006  | 0.1983   | T  | 16.64    | 4.70 x10 <sup>-5</sup> | 16.33    | 5.86 x10 <sup>-5</sup> | 3.74     | 0.0819   | -1.09   | 0.0003   |
|            | rs4910740    | 5266060  | 0.1139   | A  | 4.02     | 0.0453                 | 4.00     | 0.0458                 | 1.34     | 0.2538   | -0.77   | 0.0457   |
|            | rs7937649    | 5201149  | 0.1139   | G  | 13.49    | 0.0003                 | 11.19    | 0.0024                 | 1.29     | 0.4144   | -0.93   | 0.0027   |
|            | rs416586     | 5472327  | 0.1034   | G  | 13.31    | 0.0054                 | 7.60     | 0.0070                 | 2.70     | 0.1225   | -1.15   | 0.0084   |
|            | rs4910743    | 5288920  | 0.1772   | T  | 7.35     | 0.0193                 | 2.58     | 0.2012                 | 2.41     | 0.4881   | -0.57   | 0.0491   |
|            | rs4601817    | 5291171  | 0.1688   | A  | 6.61     | 0.0197                 | 2.76     | 0.1604                 | 1.95     | 0.5163   | -0.58   | 0.0462   |
|            | rs3834466    | 5270333  | 0.2046   | 1* | 9.17     | 0.0025                 | 1.82     | 0.2482                 | 1.16     | 0.4036   | -0.75   | 0.0180   |
|            | rs840716     | 9432232  | 0.1308   | T  | 8.11     | 0.0052                 | 6.97     | 0.0083                 | 1.06     | 0.3456   | -0.79   | 0.0130   |
|            | rs10837540   | 5193183  | 0.1203   | T  | 4.24     | 0.0481                 | 1.59     | 0.4924                 | 0.23     | 0.7020   | -0.76   | 0.0511   |
|            | rs549964658  | 5234551  | 0.2806   | G  | 8.74     | 0.0037                 | 6.11     | 0.0190                 | 0.62     | 0.4313   | -0.74   | 0.0078   |
|            | rs80138317   | 5234670  | 0        | 0  | ND       | ND                     | ND       | ND                     | ND       | ND       | ND      | ND       |
|            | rs3813727    | 5234682  | 0.1013   | G  | 0.32     | 0.5811                 | 0.29     | 0.5926                 | 0.01     | 0.9203   | -0.26   | 0.5692   |
|            | rs79582489   | 5234734  | 0        | 0  | ND       | ND                     | ND       | ND                     | ND       | ND       | ND      | ND       |
|            | rs10837643   | 5236808  | 0.1287   | A  | 3.71     | 0.0578                 | 2.88     | 0.0906                 | 0.74     | 0.5022   | -0.68   | 0.0634   |
|            | rs4320977    | 5236932  | 0.1203   | G  | 4.90     | 0.0277                 | 4.52     | 0.0335                 | 1.05     | 0.3646   | -0.85   | 0.0274   |
|            | rs4402323    | 5237362  | 0.1224   | T  | 4.58     | 0.0336                 | 4.07     | 0.0438                 | 0.88     | 0.3726   | -0.83   | 0.0327   |
|            | rs4910736    | 5237759  | 0.1224   | A  | 4.58     | 0.0336                 | 4.07     | 0.0438                 | 0.88     | 0.3726   | -0.83   | 0.0327   |
|            | rs968857     | 5239228  | 0.1203   | C  | 4.90     | 0.0277                 | 4.52     | 0.0335                 | 1.05     | 0.3646   | -0.85   | 0.0274   |
|            | rs968856     | 5239346  | 0.1181   | C  | 5.24     | 0.0225                 | 5.01     | 0.0252                 | 1.48     | 0.2636   | -0.88   | 0.0229   |
|            | rs10128555   | 5242347  | 0.004219 | C  | 0.38     | 0.5613                 | 0.95     | 0.3487                 | 4.26     | 0.0544   | ND      | ND       |
|            | rs1035498826 | 5242597  | 0        | 0  | ND       | ND                     | ND       | ND                     | ND       | ND       | ND      | ND       |
|            | rs61893081   | 5242607  | 0.008439 | G  | 1.06     | 0.3680                 | 1.94     | 0.1648                 | 0.94     | 0.3684   | ND      | ND       |
|            | rs16912210   | 5242623  | 0.01055  | G  | 0.95     | 0.3673                 | 2.39     | 0.1480                 | 0.61     | 0.4368   | ND      | ND       |

|            |             |          |          |     |       |        |       |        |      |        |       |        |
|------------|-------------|----------|----------|-----|-------|--------|-------|--------|------|--------|-------|--------|
| <b>HBB</b> | rs56205611  | 5248393  | 0        | 0   | ND    | ND     | ND    | ND     | ND   | ND     | ND    | ND     |
|            | rs28440105  | 5248569  | 0.02321  | A   | 1.74  | 0.4787 | 1.81  | 0.3770 | 2.75 | 0.1994 | -0.36 | 0.5494 |
|            | rs28379094  | 5248576  | 0.1203   | T   | 10.51 | 0.0013 | 9.42  | 0.0022 | 2.56 | 0.1342 | -1.03 | 0.0031 |
|            | rs2187608   | 5248701  | 0.1519   | G   | 14.19 | 0.0002 | 11.98 | 0.0007 | 1.27 | 0.3633 | -0.98 | 0.0011 |
|            | rs368698783 | 5249833  | 0.4662   | T   | 1.27  | 0.2680 | 0.71  | 0.4101 | 0.05 | 0.8658 | 1.63  | 0.0057 |
|            | rs558015287 | 5249873  | 0        | 0   | ND    | ND     | ND    | ND     | ND   | ND     | ND    | ND     |
|            | rs59495893  | 5252896  | 0.08439  | A   | 12.20 | 0.0018 | 13.81 | 0.0003 | 4.05 | 0.1021 | -0.92 | 0.0100 |
|            | rs2070972   | 5253487  | 0.1835   | C   | 8.87  | 0.0047 | 11.59 | 0.0007 | 3.40 | 0.1632 | -1.23 | 0.0030 |
|            | rs11036475  | 5254010  | 0.1034   | A   | 2.33  | 0.1588 | 4.39  | 0.0438 | 1.77 | 0.2202 | -0.62 | 0.1504 |
|            | rs10128653  | 5256231  | 0.006329 | C   | 0.57  | 0.4796 | 1.43  | 0.2550 | 0.44 | 0.5742 | ND    | ND     |
|            | rs3759070   | 5270398  | 0.1034   | G   | 1.20  | 0.3518 | 3.00  | 0.0996 | 4.38 | 0.0364 | 0.14  | 0.3855 |
|            | rs4910742   | 5285279  | 0.01899  | G   | 2.54  | 0.1108 | 1.33  | 0.4379 | 0.24 | 0.6216 | -0.60 | 0.2712 |
|            | rs3886223   | 5322517  | 0.08017  | T   | 4.70  | 0.0407 | 3.77  | 0.0540 | 0.52 | 0.5175 | -0.75 | 0.0617 |
|            | rs4910755   | 5351521  | 0.3734   | C   | 0.67  | 0.5057 | 0.49  | 0.5492 | 0.34 | 0.6498 | 0.15  | 0.5342 |
|            | rs4910756   | 5351626  | 0.3354   | G   | 0.54  | 0.5307 | 1.01  | 0.4520 | 0.96 | 0.3288 | 0.12  | 0.5673 |
|            | rs7483122   | 5351776  | 0.3713   | C   | 0.66  | 0.4922 | 0.58  | 0.5104 | 0.14 | 0.7924 | 0.14  | 0.5231 |
|            | rs5006884   | 5352021  | 0.3713   | T   | 0.66  | 0.4922 | 0.58  | 0.5104 | 0.17 | 0.7068 | 0.14  | 0.5231 |
|            | rs5006883   | 5352081  | 0.346    | C   | 0.77  | 0.4266 | 1.09  | 0.3800 | 0.48 | 0.4891 | 0.13  | 0.4632 |
|            | rs5024042   | 5352332  | 0.3692   | A   | 0.56  | 0.6319 | 0.24  | 0.7301 | 0.07 | 0.7920 | 0.17  | 0.6519 |
|            | rs10500635  | 5365438  | 0.3713   | A   | 1.05  | 0.5170 | 0.34  | 0.6494 | 0.06 | 0.8622 | 0.22  | 0.5404 |
|            | rs1391619   | 5434699  | 0.1709   | G   | 4.02  | 0.1347 | 7.77  | 0.0062 | 3.44 | 0.1317 | -0.42 | 0.1798 |
|            | rs10128558  | 16326884 | 0.07806  | G   | 0.19  | 0.7264 | 0.01  | 0.9099 | 1.66 | 0.2158 | 0.19  | 0.7610 |
|            | rs3841756   | 5248304  | 0.04008  | 2** | 0.11  | 0.7703 | 0.26  | 0.6861 | 0.15 | 0.7645 | 0.28  | 0.7672 |
|            | rs59215941  | 5242575  | 0        | 0   | ND    | ND     | ND    | ND     | ND   | ND     | ND    | ND     |
|            | rs757054403 | 5248353  | 0.02186  | G   | 0.08  | 0.8326 | 0.42  | 0.5859 | 2.55 | 0.2375 | ND    | 0.4588 |

\* rs3834466 genotypes codes are (1: T, 2: dupT [TT]), \*\* rs3841756 (1: T, 2: delT)

A1 indicates Minor Allele;  $\beta$ , Beta Coefficient; BP, Physical Position; **HBB**: Beta globin; ID, Identification; MAF, Minor Allele Frequency; ND, Not Determined; SNP: Single Nucleotide Polymorphism;  $\chi^2$ ; Chi-square.
